# Supplementary material for: Different responses of rhizosphere and non-rhizosphere soil microbial communities to consecutive Piper nigrum L. monoculture
Source: PubMed Central journal article supplement (PMC5075767; doi:10.1038/srep35825), 2016-10-24
Supplement: srep35825-s1.pdf [file srep35825-s1.pdf]

# **Different responses of rhizosphere and non-rhizosphere soil microbial communities to consecutive *Piper nigrum* L. monoculture**

**Zhigang Li<sup>1</sup>, Chao Zu<sup>1</sup>, Can Wang<sup>1</sup>, Jianfeng Yang<sup>1</sup>, Huan Yu<sup>1</sup> & Huasong Wu<sup>1\*</sup>**

1. Spice and Beverage Research Institute, Chinese Academy of Tropical Agricultural Sciences & Key Laboratory of Genetic Resources Utilization of Spice and Beverage Crops, Ministry of Agriculture & Hainan Provincial Key Laboratory of Genetic Improvement and Quality Regulation for Tropical Spice and Beverage Crops, Wanning 571533, Hainan, P. R. China.

**\*Correspondence author, H. S. W. (email: 13807622912@163.com)**

## Supplementary Information

**Supplementary Figure S1. Overall bacterial (a) and fungal (b) communities in the 24 soil samples from four consecutive monoculture of black pepper fields.** Average relative abundances (ARAs) were calculated as the proportion of individual bacterial and fungal taxa to the total number of 16S rRNA or ITS gene sequence reads.

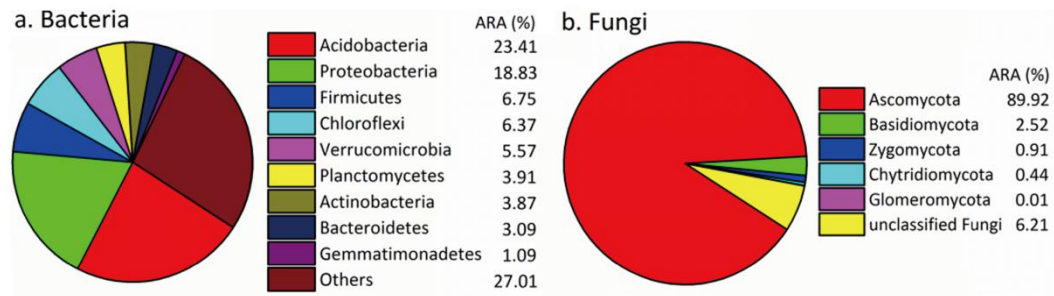

**Supplementary Table S1. Spearman's rank correlation (r) between abundant taxa and soil properties.**

|                      |                   | OM                      | AN       | AP       | AK      | pH      |          |
|----------------------|-------------------|-------------------------|----------|----------|---------|---------|----------|
| Rhizosphere soil     | Bacteria          |                         |          |          |         |         |          |
|                      |                   | <i>Acidobacteria</i>    | 0.673*   | -0.694*  | -0.563  | 0.816** | 0.107    |
|                      |                   | <i>Proteobacteria</i>   | -0.636*  | 0.660*   | 0.622*  | -0.413  | 0.320    |
|                      |                   | <i>Firmicutes</i>       | 0.417    | -0.482   | -0.353  | 0.643*  | 0.343    |
|                      |                   | <i>Chloroflexi</i>      | -0.140   | 0.005    | 0.137   | -0.047  | 0.390    |
|                      |                   | <i>Verrucomicrobia</i>  | -0.570   | 0.400    | 0.546   | -0.694* | -0.450   |
|                      |                   | <i>Actinobacteria</i>   | -0.884** | 0.813**  | 0.859** | -0.679* | -0.470   |
|                      |                   | <i>Planctomycetes</i>   | -0.149   | 0.218    | 0.041   | -0.531  | -0.274   |
|                      |                   | <i>Bacteroidetes</i>    | -0.302   | 0.175    | 0.212   | -0.617* | -0.112   |
|                      |                   | <i>Gemmatimonadetes</i> | -0.618*  | 0.585*   | 0.676*  | -0.187  | 0.016    |
|                      | <i>Nitrospira</i> | 0.631*                  | -0.643*  | -0.507   | 0.725** | -0.077  |          |
| Fungi                |                   | <i>Ascomycota</i>       | -0.774** | 0.675*   | 0.837** | -0.286  | -0.489   |
|                      |                   | <i>Basidiomycota</i>    | -0.098   | 0.317    | -0.053  | -0.540  | -0.034   |
|                      |                   | <i>Chytridiomycota</i>  | 0.044    | 0.021    | -0.005  | 0.342   | 0.310    |
|                      |                   | <i>Glomeromycota</i>    | 0.459    | -0.448   | -0.534  | 0.291   | -0.142   |
|                      |                   | <i>Zygomycota</i>       | -0.132   | 0.140    | -0.005  | -0.599* | 0.255    |
| Non-rhizosphere soil | Bacteria          |                         |          |          |         |         |          |
|                      |                   | <i>Acidobacteria</i>    | -0.713** | 0.743**  | -0.056  | -0.717* | -0.843** |
|                      |                   | <i>Proteobacteria</i>   | -0.575   | 0.535    | -0.518  | -0.485  | -0.397   |
|                      |                   | <i>Firmicutes</i>       | 0.777*   | -0.783** | -0.091  | 0.877** | 0.890**  |
|                      |                   | <i>Chloroflexi</i>      | 0.494    | 0.086    | -0.032  | -0.328  | 0.178    |
|                      |                   | <i>Verrucomicrobia</i>  | -0.472   | 0.374    | 0.302   | -0.465  | -0.548   |
|                      |                   | <i>Actinobacteria</i>   | -0.885** | 0.534    | 0.212   | -0.408  | -0.695*  |
|                      |                   | <i>Planctomycetes</i>   | -0.647*  | 0.666*   | 0.237   | -0.608* | -0.815** |
|                      |                   | <i>Bacteroidetes</i>    | -0.382   | -0.265   | 0.257   | 0.095   | -0.070   |
|                      |                   | <i>Gemmatimonadetes</i> | -0.134   | 0.473    | 0.133   | -0.669* | -0.623*  |
|                      | <i>Nitrospira</i> | 0.246                   | -0.385   | -0.140   | 0.522   | 0.524   |          |
| Fungi                |                   | <i>Ascomycota</i>       | -0.588   | 0.570    | -0.016  | -0.269  | -0.597*  |
|                      |                   | <i>Basidiomycota</i>    | 0.463    | 0.231    | -0.074  | -0.385  | -0.136   |
|                      |                   | <i>Chytridiomycota</i>  | 0.372    | -0.227   | 0.122   | 0.068   | 0.460    |
|                      |                   | <i>Glomeromycota</i>    | 0.457    | 0.194    | 0.061   | -0.279  | -0.240   |
|                      |                   | <i>Zygomycota</i>       | -0.137   | -0.197   | -0.157  | -0.095  | -0.060   |

\*P<0.05; \*\*P<0.01
